# Supplementary material
Source: Springer Nature journal article supplement (https://www.springermedizin.de/resource/supplementary/12885_2011_2746_MOESM6_ESM.pdf/9461870)

**A**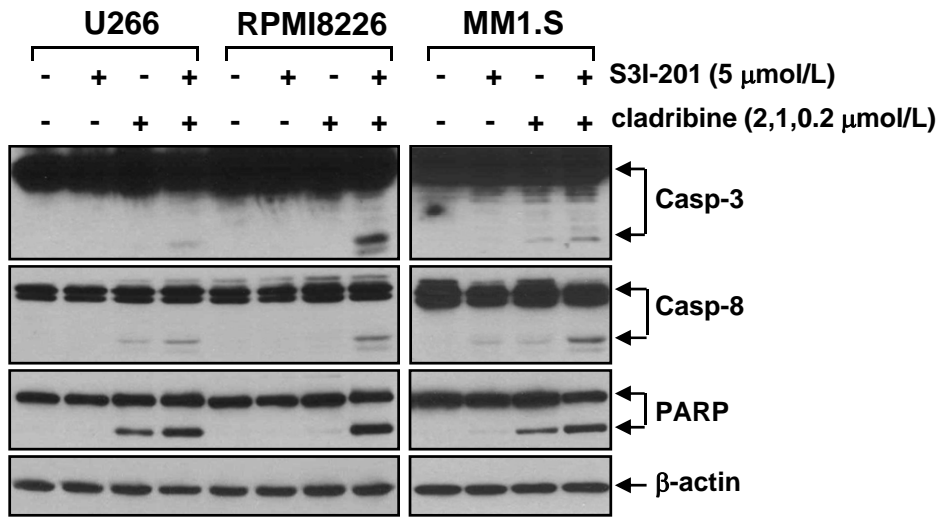**B**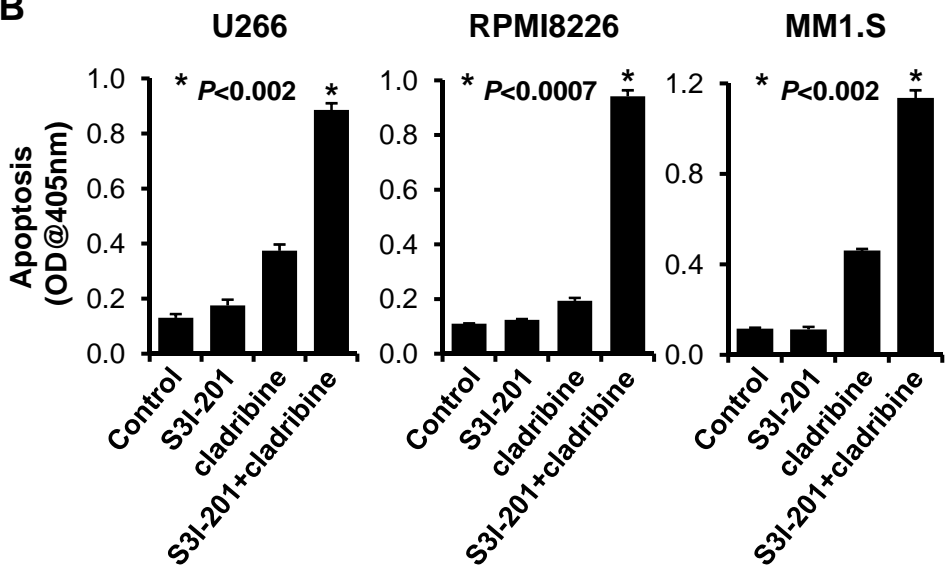

Supplement: MOESM6 [file 9461870]
